# Supplementary material for: SupeRNAlign: a new tool for flexible superposition of homologous RNA structures and inference of accurate structure-based sequence alignments
Source: PubMed Central journal article supplement — Nucleic Acids Res. 2017 Jul 20;45(16):e150. doi: 10.1093/nar/gkx631 (PMC5766185; doi:10.1093/nar/gkx631), 2017-07-20
Supplement: gkx631_supp.pdf [file gkx631_supp.pdf]

## SUPPLEMENTARY MATERIAL

### **SupeRNAlign: a new tool for flexible superposition of homologous RNA structures and inference of accurate structure-based sequence alignments**

Paweł Piątkowski<sup>1</sup>, Jagoda Jabłońska<sup>2</sup>, Adriana Żyła<sup>1</sup>, Dorota Niedziałek<sup>1</sup>, Dorota Matelska<sup>1</sup>, Elżbieta Jankowska<sup>1</sup>, Tomasz Waleń<sup>1,3</sup>, Wayne K. Dawson<sup>1</sup> and Janusz M. Bujnicki<sup>1,2,\*</sup>

<sup>1</sup> Laboratory of Bioinformatics and Protein Engineering, International Institute of Molecular and Cell Biology, ul. Trojdena 4, 02-109 Warsaw, Poland

<sup>2</sup> Institute of Molecular Biology and Biotechnology, Faculty of Biology, Adam Mickiewicz University, ul. Umultowska 89, 61-614 Poznań, Poland

<sup>3</sup> Faculty of Mathematics, Informatics, and Mechanics, University of Warsaw, Banacha 2, 02-097 Warsaw, Poland

\* To whom correspondence should be addressed. Email: [iamb@genesilico.pl](mailto:iamb@genesilico.pl)

PP and JJ contributed equally to this work

**Supplementary Table 1: Performance of individual superposition/alignment methods (median SPS scores for each family)**

| Family name        | Rfam ID | Structures | Superpositions | SETTER | iPARTS | ARTS   | SARA   | LaJolla | Rclick | R3D Align | SuprNAlign | R3D Align* | SARA-Coffee* | SA-Coffee* |
|--------------------|---------|------------|----------------|--------|--------|--------|--------|---------|--------|-----------|------------|------------|--------------|------------|
| 5S_rRNA            | RF00001 | 9          | 36             | 0.4479 | 0.6348 | 0.6385 | 0.7480 | 0.7341  | 0.7150 | 0.7362    | 0.7649     | 0.7510     | 0.7560       | 0.7570     |
| AdoCbl-variant     | RF01689 | 2          | 1              | 0.8269 | 0.9231 | 0.9423 | 0.9423 | 0.9038  | 0.9423 | 0.9423    | 0.9423     | 0.9327     | 0.9519       | 0.9327     |
| Archaea_SRP_1      | RF01857 | 2          | 1              | 0.4058 | 0.6304 | 0.6522 | 0.7174 | 0.7681  | 0.7246 | 0.6957    | 0.8623     | 0.9203     | 0.8261       | 0.9130     |
| Archaea_SRP_2      | RF01857 | 2          | 1              | 0.2313 | 0.9552 | 0.9552 | 0.9552 | 0.9627  | 0.9552 | 0.9552    | 0.9552     | 0.9552     | 0.9328       | 0.9552     |
| Bacteria_small_SRP | RF00169 | 3          | 3              | 0.4216 | 0.5294 | 0.8922 | 0.9020 | 0.8922  | 0.8922 | 0.5294    | 0.7647     | 0.6373     | 0.9216       | 0.7353     |
| c-di-GMP-I         | RF01051 | 3          | 3              | 0.2952 | 0.7909 | 0.6857 | 0.7872 | 0.7340  | 0.6915 | 0.8381    | 0.8000     | 0.8364     | 0.8727       | 0.7660     |
| Cobalamin          | RF00174 | 2          | 1              | 0.2816 | 0.7184 | 0.7379 | 0.6553 | 0.7087  | 0.7233 | 0.6990    | 0.7379     | 0.7621     | 0.7816       | 0.7330     |
| glmS               | RF00234 | 3          | 3              | 0.2966 | 0.3793 | 0.3219 | 0.3724 | 0.3793  | 0.3724 | 0.6621    | 0.7103     | 0.6414     | 0.5685       | 0.7448     |
| Glycine            | RF00504 | 2          | 1              | 0.4318 | 0.4318 | 0.8466 | 0.1932 | 0.8580  | 0.8523 | 0.5000    | 0.2022     | 0.4438     | 0.8523       | 0.1818     |
| HDV_ribozyme       | RF00094 | 2          | 1              | 0.1382 | 0.2033 | 0.2033 | 0.2033 | 0.2033  | 0.2033 | 0.2033    | 0.2033     | 0.2358     | 0.1870       | 0.1870     |
| Histone3           | RF00032 | 2          | 1              | 1      | 1      | 1      | 1      | 1       | 1      | 1         | 1          | 0.9643     | 1            | 0.9286     |
| HIV-1_DIS          | RF00175 | 2          | 1              | 0.6087 | 0      | -      | 0.6087 | 0.6087  | 0.6087 | 0         | 0          | 0          | 1            | 0.0435     |
| Intron_gpI         | RF00028 | 3          | 3              | 0.4425 | 0.4955 | 0.6725 | 0.7178 | 0.8318  | 0.7344 | 0.5087    | 0.4775     | 0.3874     | 0.5993       | 0.3844     |
| Intron_gpII        | RF00029 | 2          | 1              | 0.5294 | 0.2059 | 0      | 0.4412 | 0.2647  | 0.0588 | 0.3824    | 0.8824     | 0.9412     | 0.8235       | 1          |
| IRES_HCV           | RF00061 | 4          | 6              | 0.7307 | 0.7832 | 0.8897 | 0.7771 | 0.8416  | 0.7940 | 0.7764    | 0.7971     | 0.8639     | 0.6651       | 0.7260     |
| LSU_rRNA           |         | 3          | 3              | -      | -      | 0.8541 | -      | -       | 0.8293 | 0.8156    | 0.8525     | 0.7881     | -            | 0.8453     |
| Lysine             | RF00168 | 2          | 1              | 0.2775 | 0.9364 | 0.9827 | 0.9711 | 0.9480  | 0.9306 | 0.9595    | 0.9827     | 0.9653     | 0.9769       | 0.9653     |
| Metazoa_SRP        | RF00017 | 5          | 10             | 0.5618 | 0.6446 | 0.7858 | 0.6172 | 0.7444  | 0.6921 | 0.7061    | 0.6325     | 0.6741     | 0.5013       | 0.4535     |
| pfl                | RF01750 | 3          | 3              | 0.5075 | 0.1791 | 0.1351 | 0.5224 | 0.5672  | 0.6418 | 0.1757    | 0.4478     | 0.6119     | 0.5405       | 0.4030     |
| PreQ1              | RF00522 | 2          | 1              | 1      | 1      | 1      | 1      | 1       | 1      | 1         | 1          | 1          | 1            | 1          |
| Purine             | RF00167 | 7          | 21             | 0.6761 | 0.9296 | 0.9710 | 0.9718 | 0.9420  | 0.9577 | 0.9718    | 0.9718     | 0.9577     | 1            | 0.9718     |
| RNaseP_bact_b      | RF00011 | 2          | 1              | 0.6076 | 0.7180 | 0.9099 | 0.6337 | 0.9099  | 0.5523 | 0.6599    | 0.7122     | 0.6192     | 0.4157       | 0.5610     |
| SAM                | RF00162 | 6          | 15             | 0.2419 | 0.5917 | 0.8250 | 0.8258 | 0.8333  | 0.8468 | 0.5833    | 0.7167     | 0.7177     | 0.8629       | 0.7417     |
| SSU_rRNA           |         | 2          | 1              | 0.2044 | -      | 0.7153 | -      | -       | 0.7339 | 0.6407    | 0.8753     | 0.8946     | -            | 0.8850     |
| THF                | RF01831 | 2          | 1              | 0.0891 | 0.3960 | 0.4950 | 0.4950 | 0.4950  | 0.4059 | 0.4752    | 0.4257     | 0.5347     | 0.4257       | 0.5050     |
| tmRNA              | RF00023 | 4          | 6              | 0.8259 | 0.7576 | 0.6036 | 0.8153 | 0.9123  | 0.9538 | 0.9472    | 0.9538     | 0.8336     | 0.9472       | 0.9297     |
| TPP                | RF00059 | 3          | 3              | 0.1379 | 0.7241 | 0.7356 | 0.7356 | 0.7356  | 0.7356 | 0.7356    | 0.7356     | 0.7126     | 0.8046       | 0.8161     |
| tRNA               | RF00005 | 57         | 1596           | 0.5063 | 0.6337 | 0.6974 | 0.7500 | 0.7375  | 0.7600 | 0.7792    | 0.8182     | 0.7733     | 0.8204       | 0.8375     |
| tRNA-Sec           | RF01852 | 2          | 1              | 0.6809 | 0.5957 | 0.6702 | 0.6915 | 0.6915  | 0.7021 | 0.5000    | 0.6383     | 0.4681     | 0.7234       | 0.5957     |
| U6                 | RF00026 | 2          | 1              | 0.2222 | 0.2778 | 0.1000 | 0.2333 | -       | 0.2222 | 0.2222    | 0.2778     | 0.2556     | 0.0222       | 0.2889     |
| ydaO-yuaA          | RF00379 | 4          | 6              | 0.2334 | 0.7626 | 0.8373 | 0.8257 | 0.8237  | 0.8335 | 0.8400    | 0.8360     | 0.8360     | 0.8074       | 0.7961     |
| yybP-ykoY          | RF00080 | 2          | 1              | 0.1638 | 0.5431 | 0.5603 | 0.5776 | 0.5862  | 0.5690 | 0.4655    | 0.3362     | 0.1379     | 0.5862       | 0.3448     |
| Whole dataset      |         | 151        | 1734           | 0.5057 | 0.6400 | 0.7020 | 0.7530 | 0.7435  | 0.7631 | 0.7791    | 0.8181     | 0.7750     | 0.8203       | 0.8354     |

Asterisks (\*) denote sequence alignments yielded directly by the program (not generated by pdb3aln based on the superimposed structures)

**Supplementary Table 2: Performance of individual superposition/alignment methods (median 3SP scores for each family)**

| Family name        | Rfam ID | Structures | Superpositions | SETTER | iPARTS | ARTS   | SARA   | LaJolla | Rclick | R3D Align | SuprNAlign | R3D Align* | SARA-Coffee* | SA-Coffee* |
|--------------------|---------|------------|----------------|--------|--------|--------|--------|---------|--------|-----------|------------|------------|--------------|------------|
| 5S_rRNA            | RF00001 | 9          | 36             | 0.3039 | 0.5655 | 0.6208 | 0.7318 | 0.7040  | 0.7107 | 0.6733    | 0.7462     | 0.7894     | 0.7071       | 0.7594     |
| AdoCbl-variant     | RF01689 | 2          | 1              | 0.7370 | 0.8586 | 0.8976 | 0.8976 | 0.8490  | 0.8976 | 0.8976    | 0.8976     | 0.9075     | 0.9171       | 0.9075     |
| Archaea_SRP_1      | RF01857 | 2          | 1              | 0.3424 | 0.5013 | 0.6633 | 0.6959 | 0.7445  | 0.6298 | 0.6036    | 0.8381     | 0.9020     | 0.7619       | 0.8868     |
| Archaea_SRP_2      | RF01857 | 2          | 1              | 0.3072 | 0.9670 | 0.9670 | 0.9670 | 0.9494  | 0.9670 | 0.9670    | 0.9670     | 0.9563     | 0.9345       | 0.9670     |
| Bacteria_small_SRP | RF00169 | 3          | 3              | 0.2108 | 0.3599 | 0.8032 | 0.8796 | 0.8032  | 0.8361 | 0.4552    | 0.7157     | 0.7710     | 0.8179       | 0.7486     |
| c-di-GMP-I         | RF01051 | 3          | 3              | 0.2316 | 0.7429 | 0.6429 | 0.7770 | 0.7504  | 0.6957 | 0.8190    | 0.8000     | 0.8357     | 0.8190       | 0.7663     |
| Cobalamin          | RF00174 | 2          | 1              | 0.2053 | 0.6979 | 0.7076 | 0.6180 | 0.6769  | 0.6923 | 0.6882    | 0.7480     | 0.7520     | 0.7376       | 0.7617     |
| glmS               | RF00234 | 3          | 3              | 0.2607 | 0.4579 | 0.4839 | 0.5277 | 0.5217  | 0.4582 | 0.3676    | 0.4584     | 0.3573     | 0.4184       | 0.4839     |
| Glycine            | RF00504 | 2          | 1              | 0.2159 | 0.2159 | 0.7718 | 0.4148 | 0.7775  | 0.7898 | 0.2500    | 0.4119     | 0.4643     | 0.7595       | 0.3636     |
| HDV_ribozyme       | RF00094 | 2          | 1              | 0.2999 | 0.6016 | 0.6016 | 0.6016 | 0.5247  | 0.6016 | 0.6016    | 0.6016     | 0.5987     | 0.5935       | 0.5935     |
| Histone3           | RF00032 | 2          | 1              | 1      | 1      | 1      | 1      | 1       | 1      | 1         | 1          | 0.9821     | 1            | 0.9643     |
| HIV-1_DIS          | RF00175 | 2          | 1              | 0.3043 | 0      | -      | 0.3043 | 0.3043  | 0.3043 | 0         | 0          | 0          | 0.5000       | 0.0217     |
| Intron_gpI         | RF00028 | 3          | 3              | 0.2494 | 0.2488 | 0.4433 | 0.5469 | 0.5879  | 0.5966 | 0.2772    | 0.2678     | 0.3959     | 0.5420       | 0.2584     |
| Intron_gpII        | RF00029 | 2          | 1              | 0.4076 | 0.2458 | 0.1786 | 0.4706 | 0.1681  | 0.1008 | 0.2269    | 0.9055     | 0.9706     | 0.6975       | 1          |
| IRES_HCV           | RF00061 | 4          | 6              | 0.3654 | 0.3996 | 0.6817 | 0.4698 | 0.4357  | 0.4346 | 0.4064    | 0.4642     | 0.5127     | 0.3325       | 0.3998     |
| LSU_rRNA           |         | 3          | 3              | -      | -      | 0.8322 | -      | -       | 0.7971 | 0.7850    | 0.8410     | 0.7964     | -            | 0.8265     |
| Lysine             | RF00168 | 2          | 1              | 0.2689 | 0.9203 | 0.9913 | 0.9719 | 0.9397  | 0.9311 | 0.9524    | 0.9913     | 0.9690     | 0.9884       | 0.9827     |
| Metazoa_SRP        | RF00017 | 5          | 10             | 0.3857 | 0.3929 | 0.4593 | 0.5234 | 0.4894  | 0.4670 | 0.4005    | 0.5960     | 0.5987     | 0.4267       | 0.5061     |
| pfl                | RF01750 | 3          | 3              | 0.5454 | 0.1104 | 0.0884 | 0.5557 | 0.5343  | 0.6334 | 0.1920    | 0.5364     | 0.7018     | 0.5454       | 0.5140     |
| PreQ1              | RF00522 | 2          | 1              | 1      | 1      | 1      | 1      | 1       | 1      | 0.5000    | 1          | 0.5000     | 1            | 1          |
| Purine             | RF00167 | 7          | 21             | 0.6343 | 0.9267 | 0.9630 | 0.9655 | 0.9365  | 0.9594 | 0.9630    | 0.9681     | 0.9514     | 0.9815       | 0.9514     |
| RNaseP_bact_b      | RF00011 | 2          | 1              | 0.3142 | 0.3590 | 0.6945 | 0.3794 | 0.6945  | 0.4116 | 0.3299    | 0.3561     | 0.5492     | 0.2391       | 0.2805     |
| SAM                | RF00162 | 6          | 15             | 0.1210 | 0.5181 | 0.8292 | 0.8453 | 0.8356  | 0.8375 | 0.4356    | 0.7334     | 0.7694     | 0.8525       | 0.7458     |
| SSU_rRNA           |         | 2          | 1              | 0.1778 | -      | 0.7016 | -      | -       | 0.7263 | 0.6131    | 0.8726     | 0.9026     | -            | 0.8913     |
| THF                | RF01831 | 2          | 1              | 0.0446 | 0.3786 | 0.5947 | 0.5809 | 0.5809  | 0.4807 | 0.4876    | 0.5879     | 0.6840     | 0.4490       | 0.6691     |
| tmRNA              | RF00023 | 4          | 6              | 0.6970 | 0.6537 | 0.6293 | 0.7384 | 0.8208  | 0.9141 | 0.8905    | 0.9180     | 0.8008     | 0.8525       | 0.8711     |
| TPP                | RF00059 | 3          | 3              | 0.0690 | 0.8103 | 0.8103 | 0.8504 | 0.8398  | 0.8103 | 0.4944    | 0.8504     | 0.5050     | 0.8333       | 0.7874     |
| tRNA               | RF00005 | 57         | 1596           | 0.4398 | 0.5793 | 0.6694 | 0.7211 | 0.7089  | 0.7359 | 0.6626    | 0.8106     | 0.7580     | 0.7788       | 0.8429     |
| tRNA-Sec           | RF01852 | 2          | 1              | 0.6833 | 0.6122 | 0.7351 | 0.7315 | 0.7600  | 0.7653 | 0.5357    | 0.7477     | 0.7055     | 0.7760       | 0.7407     |
| U6                 | RF00026 | 2          | 1              | 0.1111 | 0.1701 | 0.2063 | 0.3354 | -       | 0.2049 | 0.1111    | 0.2639     | 0.2840     | 0.0111       | 0.2382     |
| ydaO-yuaA          | RF00379 | 4          | 6              | 0.2225 | 0.7662 | 0.8453 | 0.8236 | 0.8417  | 0.8462 | 0.4539    | 0.8285     | 0.4516     | 0.8376       | 0.7980     |
| yybP-ykoY          | RF00080 | 2          | 1              | 0.1819 | 0.6841 | 0.6802 | 0.6888 | 0.6806  | 0.6845 | 0.5703    | 0.5681     | 0.5440     | 0.6306       | 0.5849     |
| Whole dataset      |         | 151        | 1734           | 0.4317 | 0.5812 | 0.6737 | 0.7246 | 0.7120  | 0.7383 | 0.6621    | 0.8078     | 0.7627     | 0.7802       | 0.8399     |

Asterisks (\*) denote sequence alignments yielded directly by the program (not generated by pdb3aln based on the superimposed structures)

**Supplementary Table 3: Differences of median SPS between programs.**

|                    | SETTER | iPARTS | ARTS   | SARA   | LaJolla | RClick | R3D Align | SupERN Align | R3D Align* | SARA-Coffee | SupERN Align-Coffee |
|--------------------|--------|--------|--------|--------|---------|--------|-----------|--------------|------------|-------------|---------------------|
| SETTER             | 0      | -0.134 | -0.196 | -0.247 | -0.238  | -0.257 | -0.273    | -0.312       | -0.269     | -0.315      | -0.330              |
| iPARTS             | 0.134  | 0      | -0.062 | -0.113 | -0.104  | -0.123 | -0.139    | -0.178       | -0.135     | -0.180      | -0.195              |
| ARTS               | 0.196  | 0.062  | 0      | -0.051 | -0.042  | -0.061 | -0.077    | -0.116       | -0.073     | -0.118      | -0.133              |
| SARA               | 0.247  | 0.113  | 0.051  | 0      | 0.009   | -0.010 | -0.026    | -0.065       | -0.022     | -0.067      | -0.082              |
| LaJolla            | 0.238  | 0.104  | 0.042  | -0.009 | 0       | -0.020 | -0.036    | -0.075       | -0.031     | -0.077      | -0.092              |
| RClick             | 0.257  | 0.123  | 0.061  | 0.010  | 0.020   | 0      | -0.016    | -0.055       | -0.012     | -0.057      | -0.072              |
| R3D Align          | 0.273  | 0.139  | 0.077  | 0.026  | 0.036   | 0.016  | 0         | -0.039       | 0.004      | -0.041      | -0.056              |
| SupERNAlign        | 0.312  | 0.178  | 0.116  | 0.065  | 0.075   | 0.055  | 0.039     | 0            | 0.043      | -0.002      | -0.017              |
| R3D Align*         | 0.269  | 0.135  | 0.073  | 0.022  | 0.031   | 0.012  | -0.004    | -0.043       | 0          | -0.045      | -0.060              |
| SARA-Coffee        | 0.315  | 0.180  | 0.118  | 0.067  | 0.077   | 0.057  | 0.041     | 0.002        | 0.045      | 0           | -0.015              |
| SupERNAlign-Coffee | 0.330  | 0.195  | 0.133  | 0.082  | 0.092   | 0.072  | 0.056     | 0.017        | 0.060      | 0.015       | 0                   |

**Legend:**

0.001 ≤ P < 0.05

1·10<sup>-10</sup> ≤ P < 0.001

P < 1·10<sup>-10</sup>

Values in the table reflect the differences of median SPS scores between programs in the left column and programs in the upper row. Colored background means that selected program from the left column scored significantly better than a program from the upper row (different colors denote levels of P-values, as described in the legend.)

**Supplementary Table 4: Differences of median RMSD between programs.**

|             | SETTER | ARTS   | iPARTS | LaJolla | SARA   | RClick | R3D Align | SupERN Align |
|-------------|--------|--------|--------|---------|--------|--------|-----------|--------------|
| SETTER      | 0      | -1.537 | -1.899 | -2.155  | -2.311 | -2.532 | -2.554    | -2.838       |
| ARTS        | 1.537  | 0      | -0.362 | -0.618  | -0.774 | -0.995 | -1.017    | -1.301       |
| iPARTS      | 1.899  | 0.362  | 0      | -0.256  | -0.412 | -0.633 | -0.655    | -0.939       |
| LaJolla     | 2.155  | 0.618  | 0.256  | 0       | -0.156 | -0.377 | -0.399    | -0.682       |
| SARA        | 2.311  | 0.774  | 0.412  | 0.156   | 0      | -0.221 | -0.243    | -0.526       |
| RClick      | 2.532  | 0.995  | 0.633  | 0.377   | 0.221  | 0      | -0.022    | -0.306       |
| R3D Align   | 2.554  | 1.017  | 0.655  | 0.399   | 0.243  | 0.022  | 0         | -0.284       |
| SupERNAlign | 2.838  | 1.301  | 0.939  | 0.682   | 0.526  | 0.306  | 0.284     | 0            |

**Legend:** $0.001 \leq P < 0.05$  $1 \cdot 10^{-10} \leq P < 0.001$  $P < 1 \cdot 10^{-10}$ 

Values in the table reflect the differences of median RMSD scores between programs in the upper row and programs in the left column. Colored background means that selected program from the left column scored significantly better than a program from the upper row (different colors denote levels of P-values, as described in the legend.)

**Supplementary Table 5: Comparison of SPS scores obtained by SuperNAlign with and without ClaRNet.**

| <b>Aligner</b>        | <b>P-value</b> |
|-----------------------|----------------|
| SuperNAlign-ARTS      | 9.854023e-10   |
| SuperNAlign-LaJolla   | 0.001078868    |
| SuperNAlign-R3D Align | 7.541349e-11   |
| SuperNAlign-SARA      | 0.999994       |
| SuperNAlign-Setter    | 0.003803946    |

Values in the table show the results of Wilcoxon test for SPS scores obtained by SuperNAlign (with different superposition tools) with and without a preliminary clustering by ClaRNet. Null hypothesis: results returned by SuperNAlign with ClaRNet are not better than without ClaRNet.

**Supplementary Table 6: Parameters of ClaRNet.**

| <b>Parameter</b>                     | <b>Value</b> |
|--------------------------------------|--------------|
| MCL inflation parameter ( <i>I</i> ) | 1.3          |
| Detected contacts threshold          | 0.6          |
| <b>Contacts scores</b>               |              |
| covalent                             | 0.5          |
| canonical_bp                         | 2.0          |
| non-canonical_bp                     | 1.0          |
| stacking                             | 1.0          |
| base-phosphate                       | 1.0          |
| base-ribose                          | 1.0          |
| other                                | 1.0          |

Values of default parameters used in ClaRNet procedure.



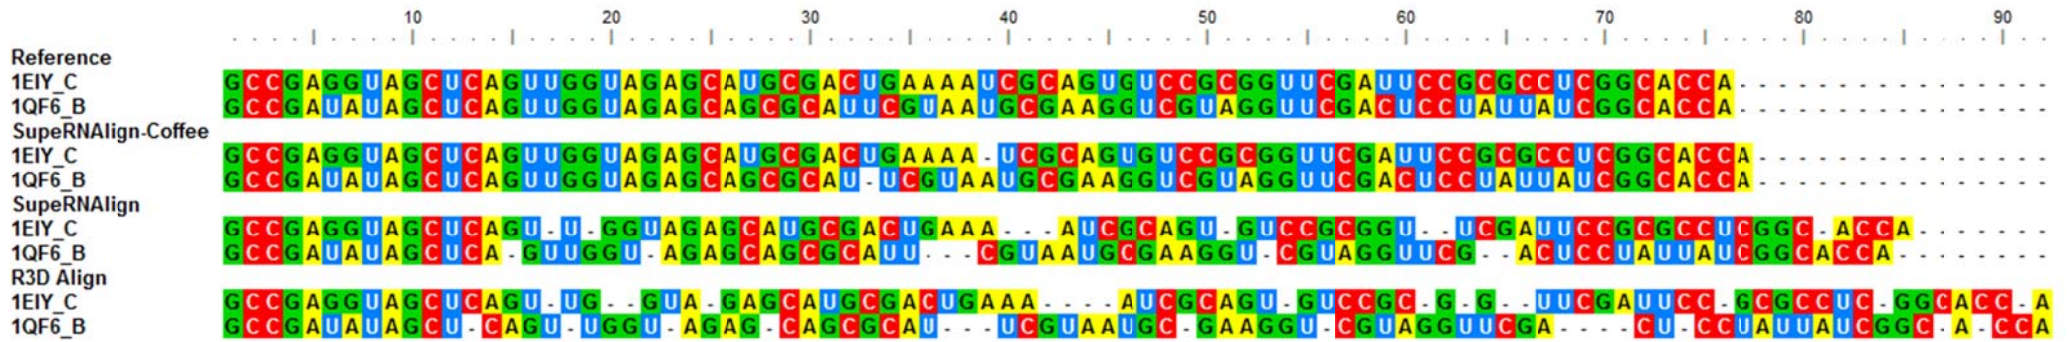

Supplementary Figure 2. Comparison of the sequence alignments for an example pair (1EIY\_C and 1QF6\_B) between highest-scoring programs and Rfam. Higher similarity of the alignment created by SuperRNAAlign-Coffee to the reference alignment can be clearly seen.



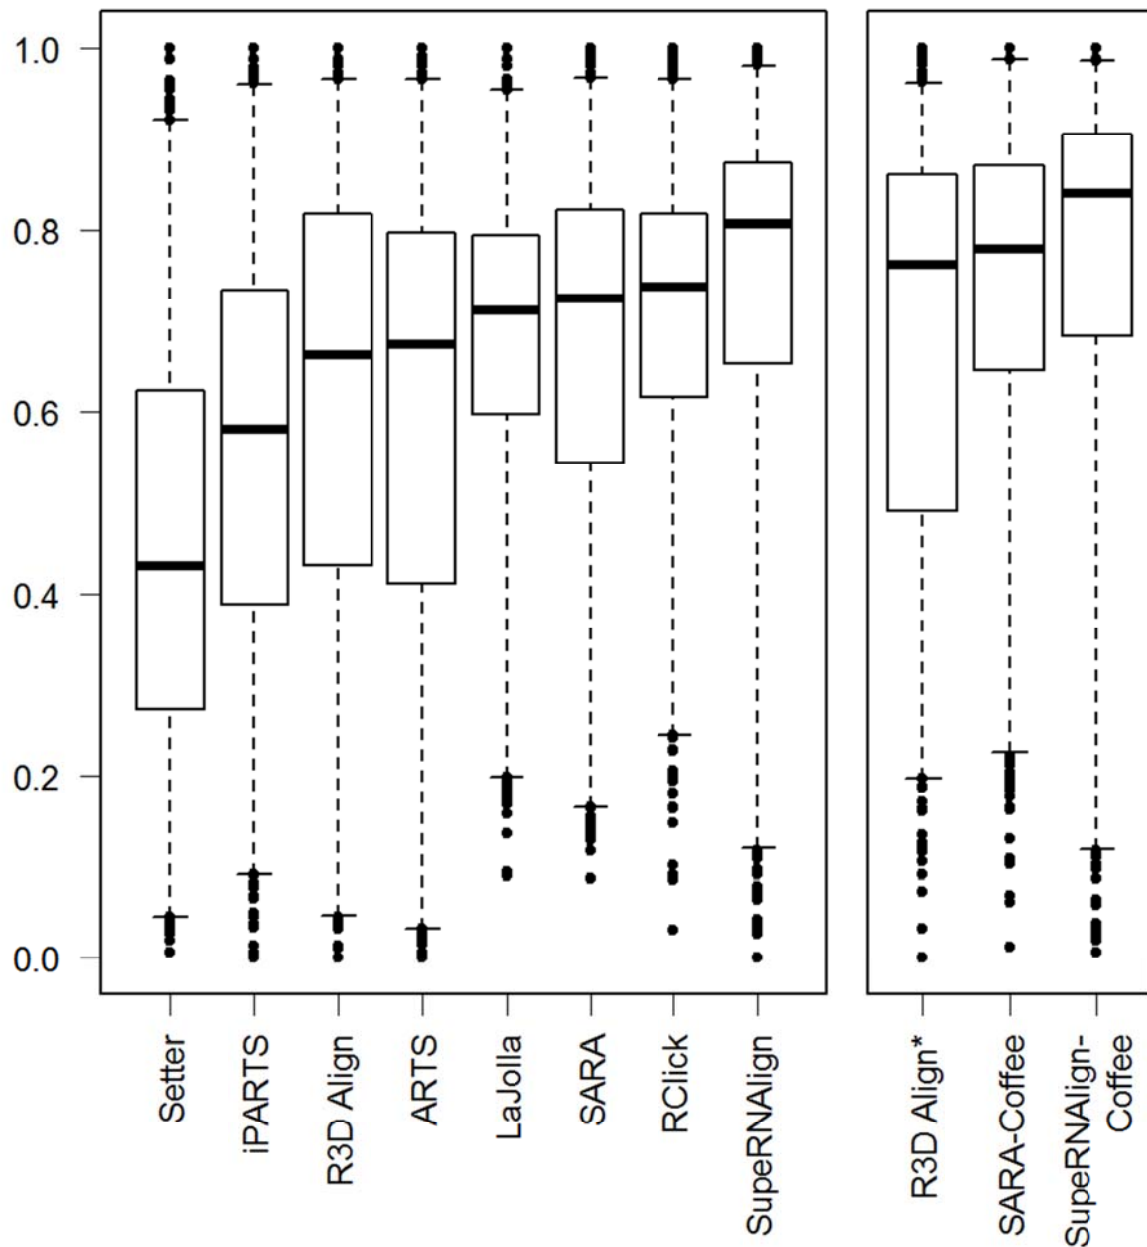

Supplementary Figure 3. Distribution of 3SP scores obtained by the RNA superposition methods. Boxes mark quartiles (Q1, median, Q3); whiskers stretch from 1<sup>st</sup> to 99<sup>th</sup> percentile; outliers are shown as dots.

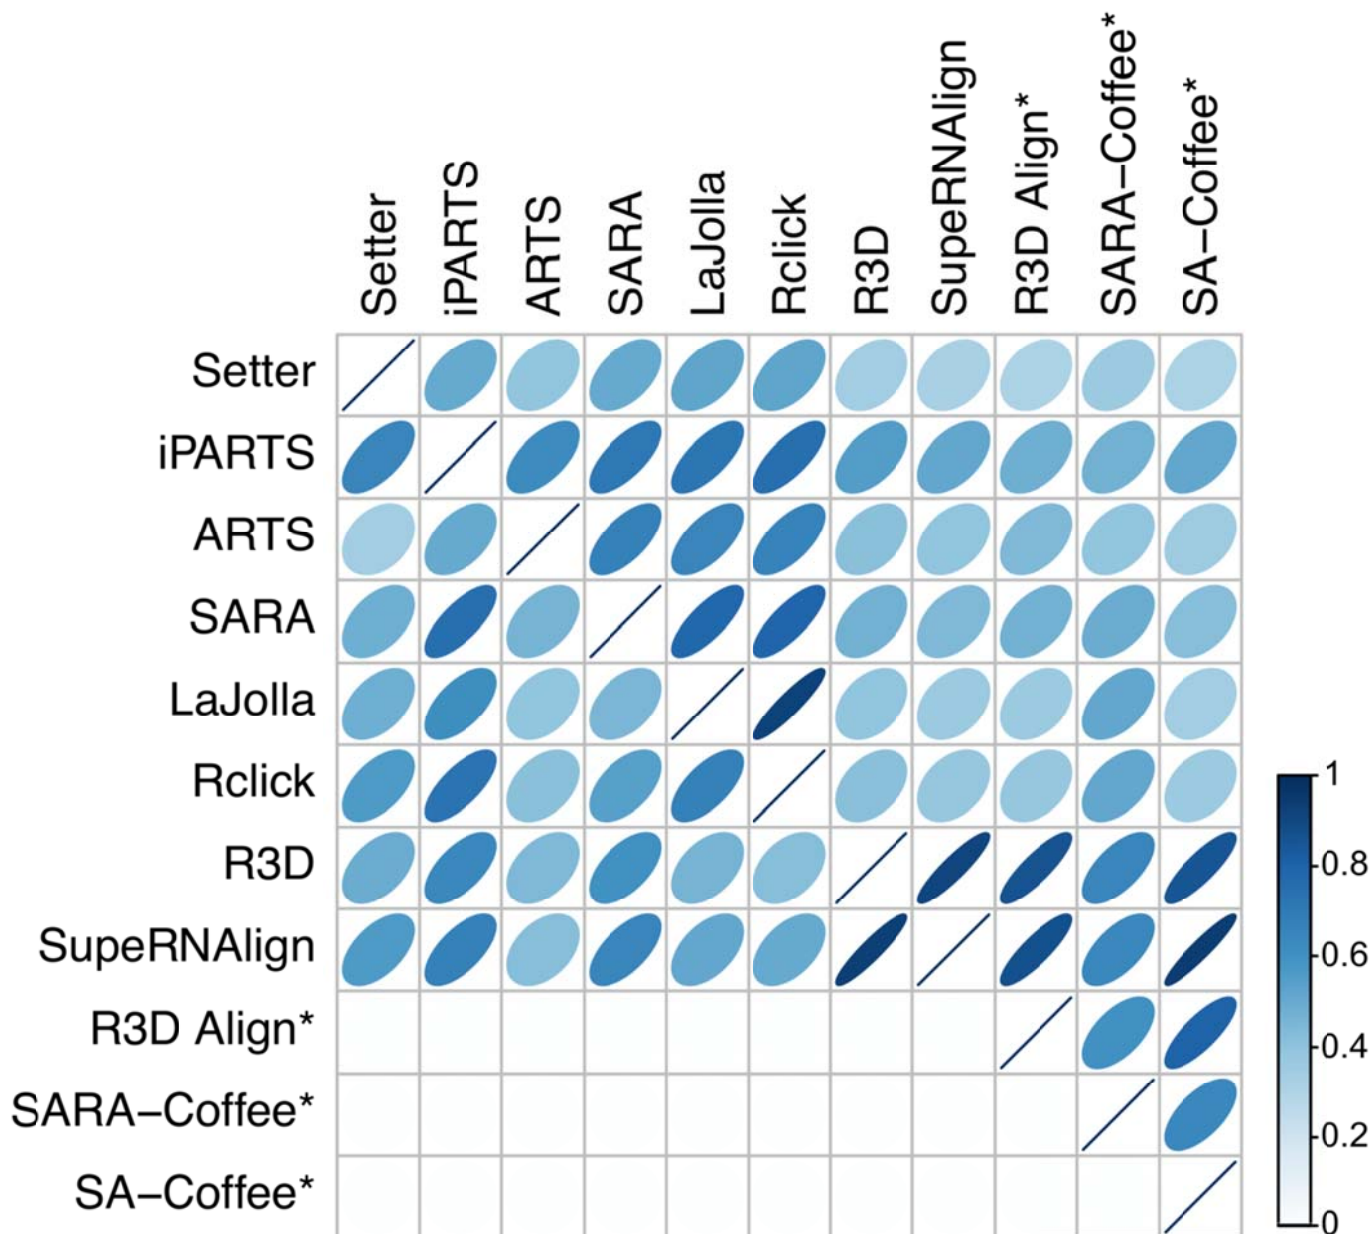

Supplementary Figure 4. Correlations between scores (top-right part of the matrix: sum-of-pairs values, bottom-left part of the matrix, RMSD values) achieved by the benchmarked programs. The darker the ellipse and the higher its ellipticity, the higher Spearman's  $\rho$  coefficient.

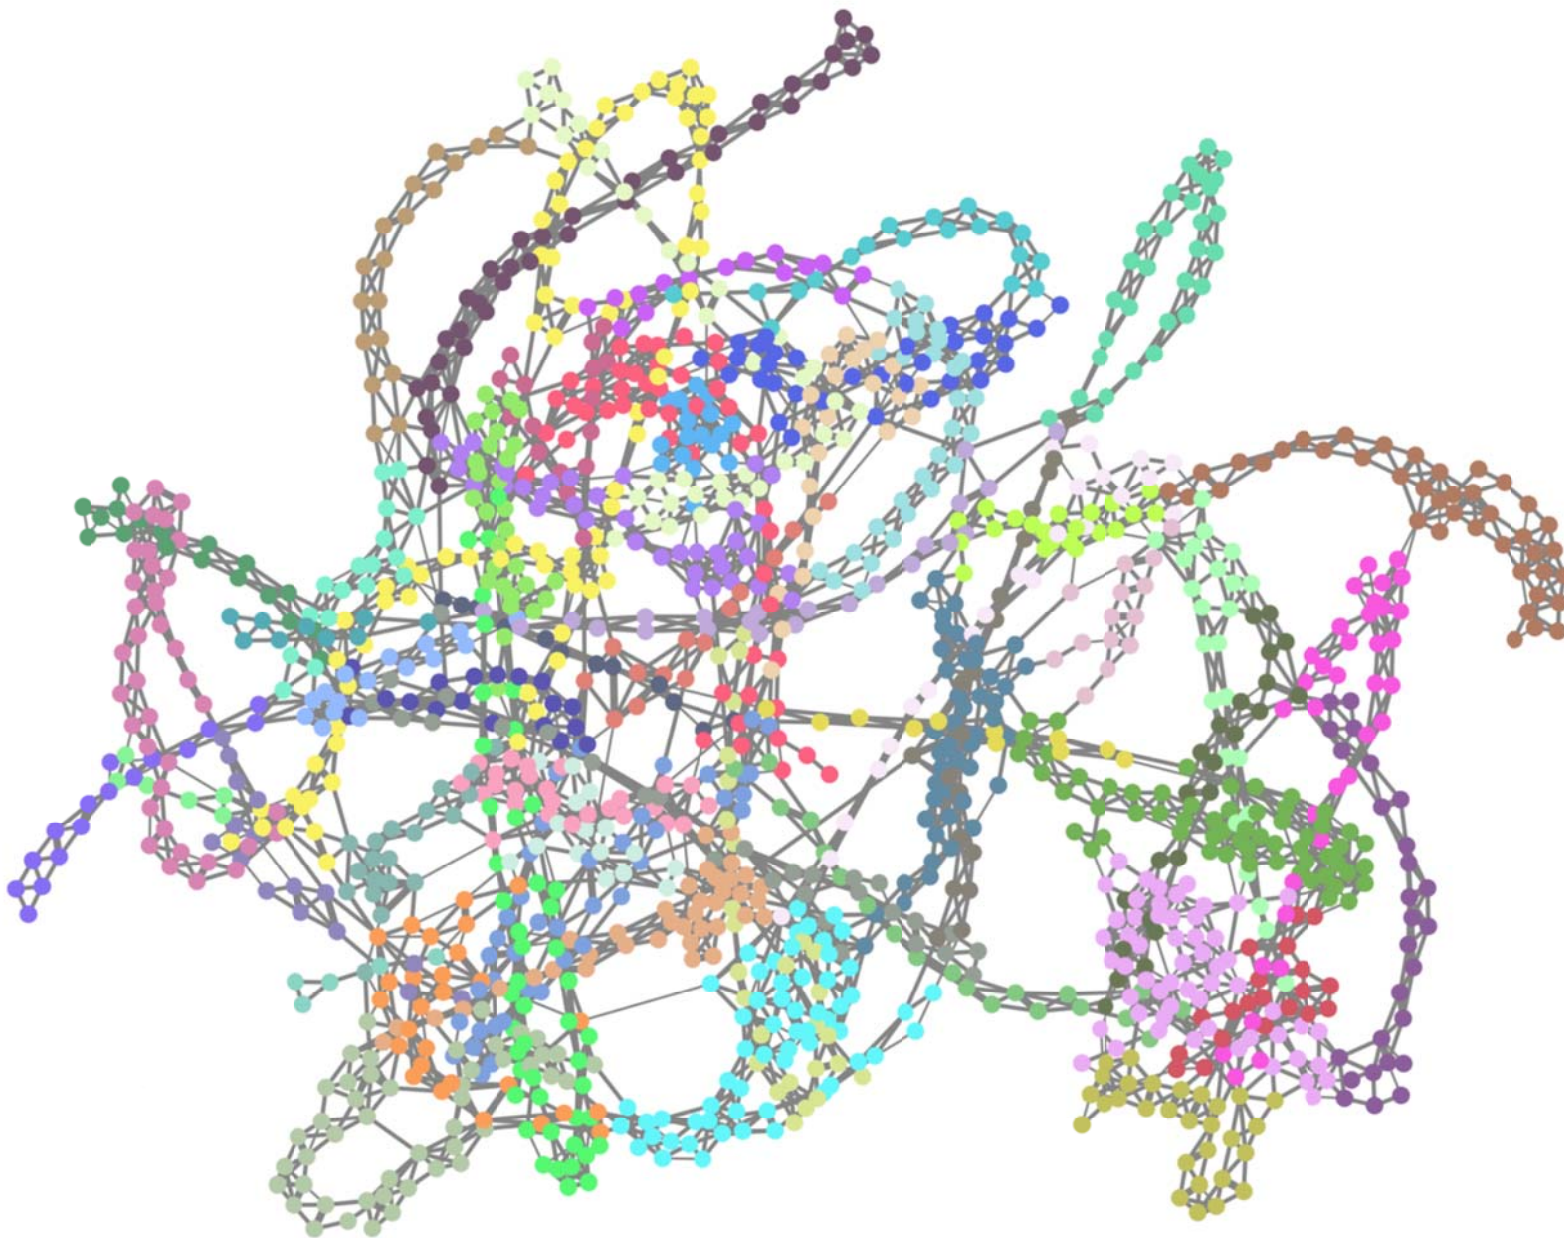

Supplementary Figure 5. A graph generated by ClaRNet for the 16S rRNA structure (PDB code: 2AW7\_A), which illustrates that even extremely large and complex structures can be analyzed with the software. Superimposing of this structure on 1FJG\_A is depicted in Supplementary Figure 4.



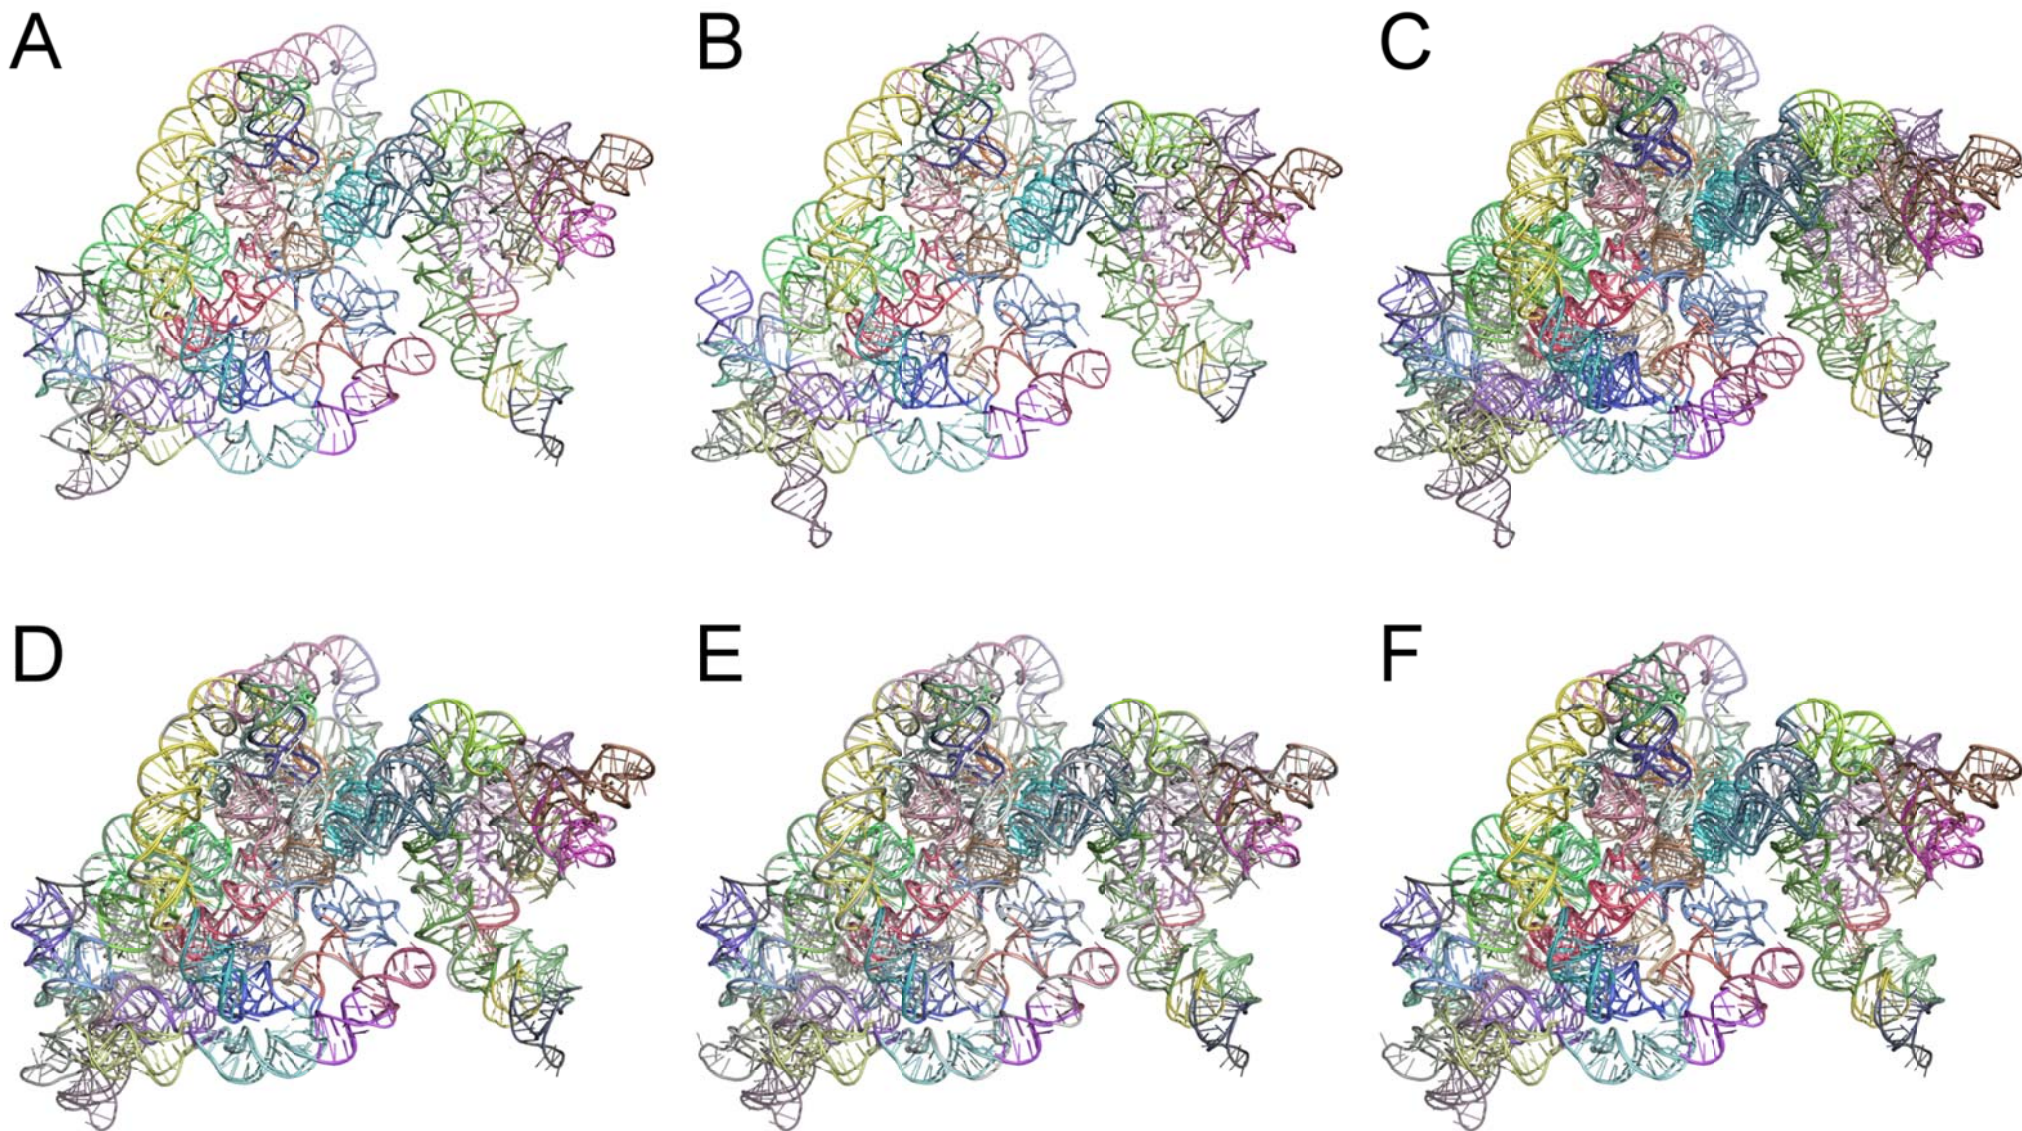

Supplementary Figure 6. Graphical illustration of SuperRNAAlign workflow for a pair of 16S rRNA molecules (1FJG\_A and 2AW7\_A). Colors denote different clusters determined by ClaRNet (see Supplementary Figure 3), or respective regions in the reference structure; frozen fragments are light grey. A) Reference structure (1FJG). B) Aligned structure (2AW7) after clustering by ClaRNet. C) Initial (global) superposition of the two structures. D), E) Intermediate stages; frozen fragments marked light grey. F) Final superposition.

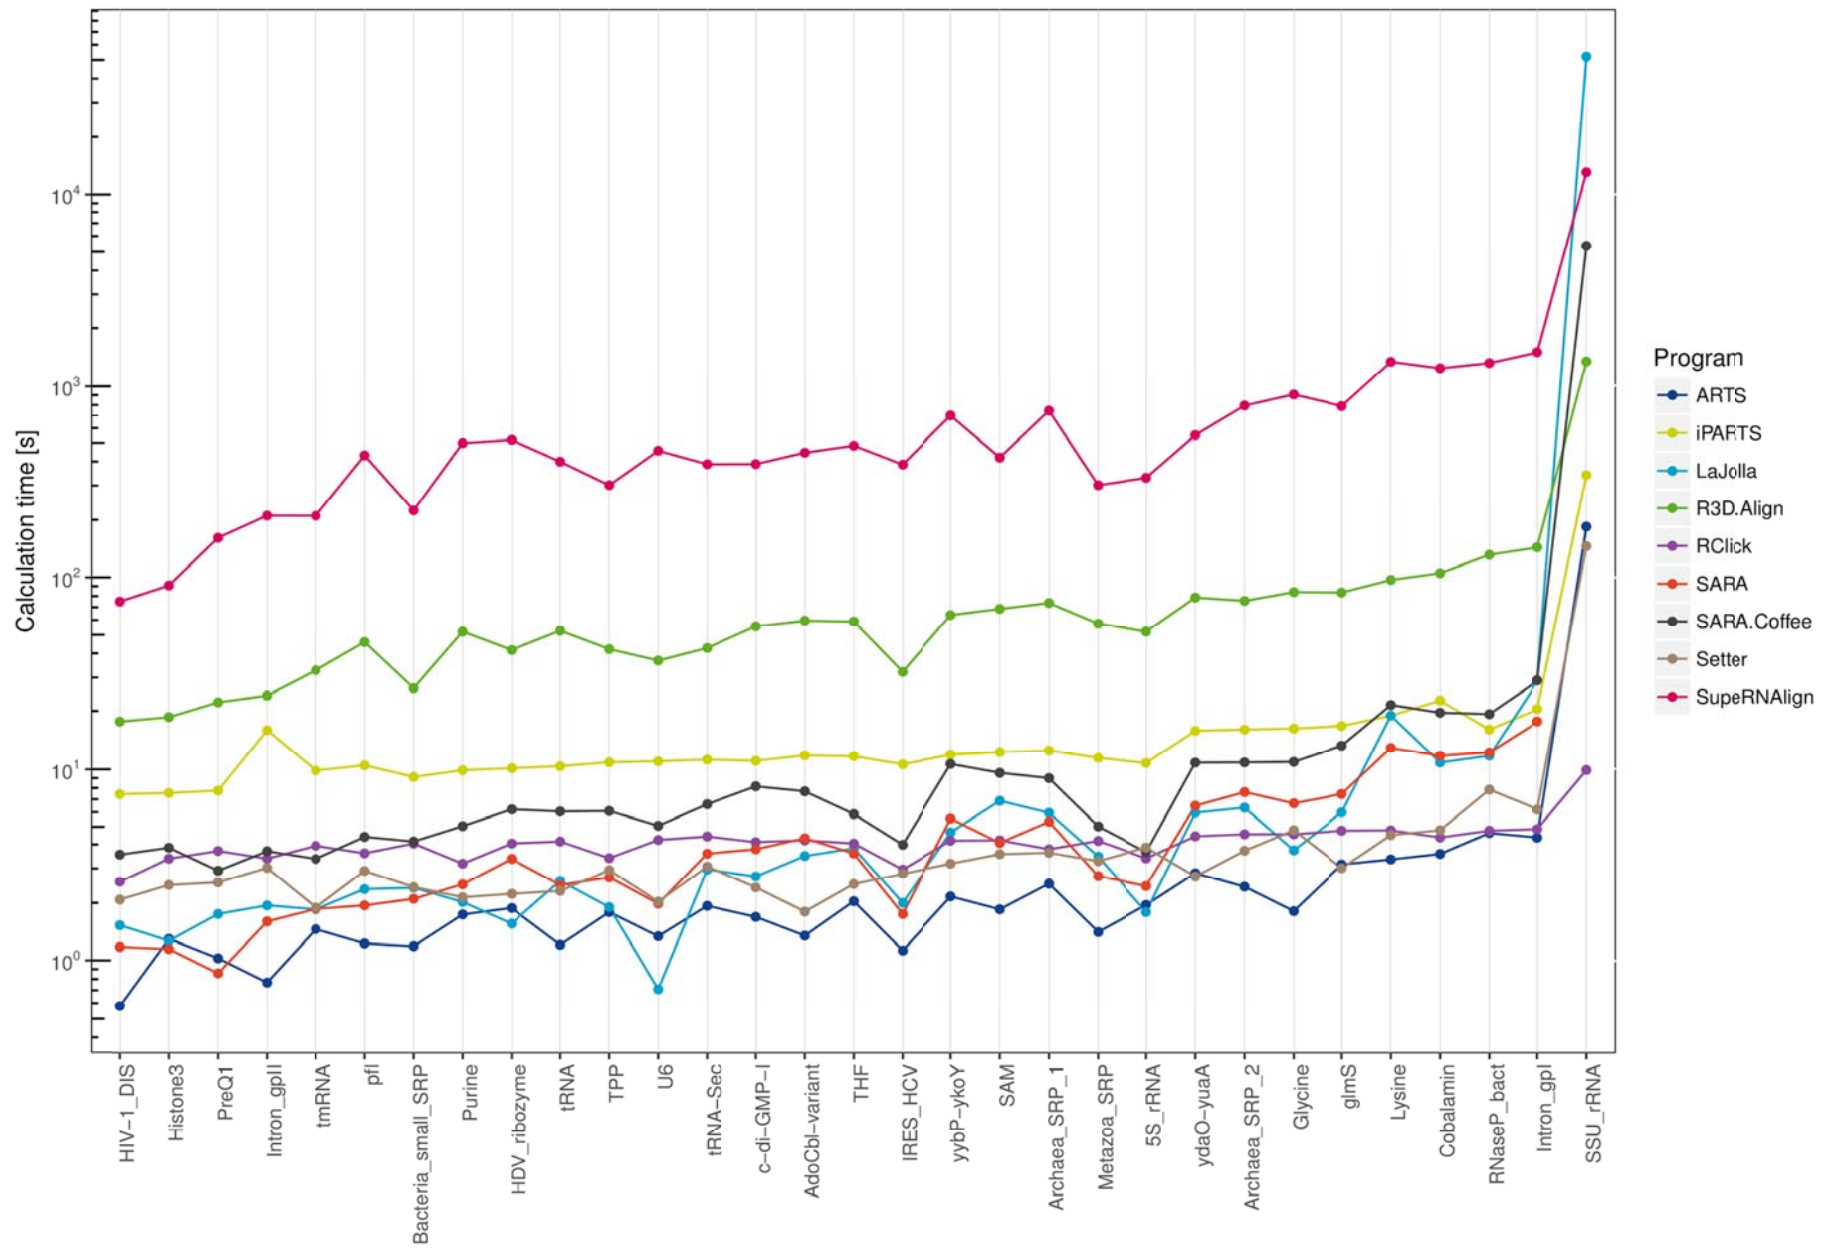

Supplementary Figure 7. Running times (in seconds) for selected structure pairs from each RNA family.

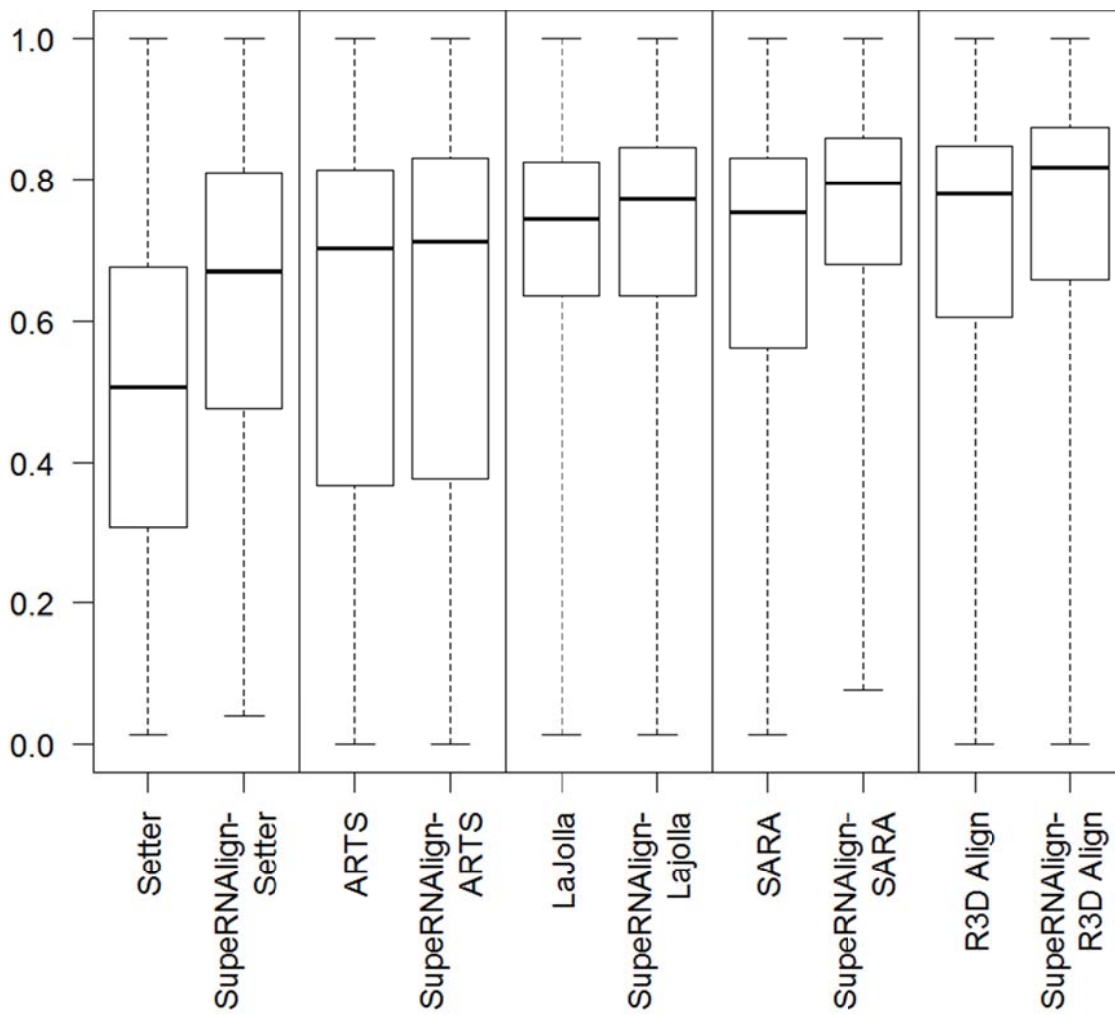

Supplementary Figure 8. The comparison of SPS scores for aligners alone and combined with SuperRNAAlign.
